# Supplementary material
Source: publisher site journal article supplement (https://www.dovepress.com/article/470728)
Supplement: Supplementary file 1 [file get_supplementary_file.php]

## Clinical and economic impact of early diagnosis of chronic kidney disease in general practice: the ENDORSE study

### Supplementary material

#### Millewin computerized medical record

The data considered for the study were collected by extraction from the Millewin computerized medical record: a computerized and problem-oriented medical record (CMOP), equipped with a Clinical Decision Support System (DSS), and a software (Milleutilità) based on the Postgres-SQL language for the extraction of recorded data, used by the general practitioners included in the study (n = 53, residing in Italy, 18 females and 35 males) in their usual clinical practice. Millewin is a Class 1 (as per EU 2017/745 regulation) Medical Device (Medical devices are all instruments, appliances, equipment, software, implants, reagents, materials or other items that are used alone or in combination to intervene on a subject, i.e. human being, and called a patient for diagnosis, prevention, monitoring, prediction disease, prognosis, treatment) registered with the Italian Ministry of Health with ID 1847935. In order to guarantee homogeneity of data collection/management and results, only Italian GPs with Millewin digital platform installed were selected for this study. Patients' data were anonymized. All entries were used for statistical analyses.

Figure S1. Training and co-management plan on a regional basis

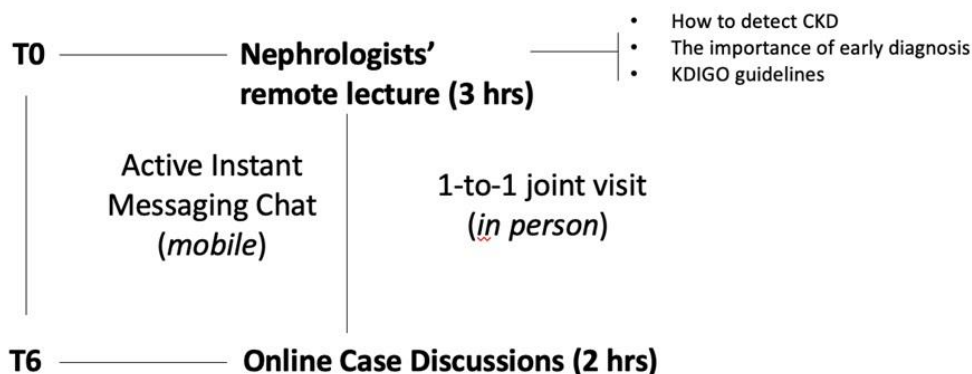

Legend: CKD: Chronic kidney disease

**Table S1. Costs associated with CKD stages and with dialysis.**

| <b>CKD stages</b>   | <b>Annual cost</b> |
|---------------------|--------------------|
| CKD 1               | € 1.169            |
| CKD 2               | € 1.506            |
| CKD 3a              | € 1.635            |
| CKD 3b              | € 2.555            |
| CKD 4               | € 4.147            |
| CKD 5               | € 5.453            |
| <b>Dialysis</b>     |                    |
| Haemodialysis       | € 43.800           |
| Peritoneal dialysis | € 29.800           |
| Indirect costs      | € 6.650            |

Legend: CKD: Chronic kidney disease

Direct costs associated with CKD stages and dialysis costs (both direct and indirect) were obtained from the studies by Jommi et al. and Cicchetti et al.[14,15]

**Table S2. Detail of the number of tests according to comorbidities**

| Group   | Variable                  | T0 (%) | T6 (%) | Delta (%) |
|---------|---------------------------|--------|--------|-----------|
| T2DM    | eGFR < 60                 |        |        |           |
|         | mL/min/1.73m <sup>2</sup> | 5,4    | 9,7    | +79       |
|         | eGFR                      | 22,7   | 38,4   | +69       |
| HT      | ACR                       | 8,4    | 18,0   | +114      |
|         | eGFR < 60                 |        |        |           |
|         | mL/min/1.73m <sup>2</sup> | 4,7    | 7,4    | +58       |
| HF      | eGFR                      | 22,2   | 32,3   | +45       |
|         | ACR                       | 3,5    | 6,7    | +90       |
|         | eGFR < 60                 |        |        |           |
| Overall | mL/min/1.73m <sup>2</sup> | 8,9    | 17,6   | +98       |
|         | eGFR                      | 20,2   | 35,3   | +74       |
|         | ACR                       | 4,5    | 10,0   | +121      |
| Overall | eGFR < 60                 |        |        |           |
|         | mL/min/1.73m <sup>2</sup> | 1,7    | 2,7    | +62       |
|         | eGFR                      | 13,0   | 18,4   | +41       |
|         | ACR                       | 1,3    | 2,5    | +91       |

Legend:

T2DM, Type 2 diabetes; HT, Hypertension; HF, Heart Failure; eGFR,estimated Glomerular Filtration Rate; ACR, Albumin-Creatinine Ratio

Table S3. eGFR tests performed at t0 and t6

|           |                   | ENDORSE Data  |              |
|-----------|-------------------|---------------|--------------|
|           |                   | Number        | Percentage   |
| <b>T0</b> | <b>eGFR tests</b> | <b>14.241</b> | <b>13,0%</b> |
|           | eGFR level G1     | 5.932         | 41,7%        |
|           | eGFR level G2     | 6.490         | 45,6%        |
|           | eGFR level G3a    | 1.198         | 8,4%         |
|           | eGFR level G3b    | 406           | 2,9%         |
|           | eGFR level G4     | 86            | 0,6%         |
|           | eGFR level G5     | 129           | 0,9%         |
| <b>T6</b> | <b>eGFR tests</b> | <b>20.610</b> | <b>18,4%</b> |
|           | eGFR level G1     | 8.013         | 38,9%        |
|           | eGFR level G2     | 9.581         | 46,5%        |
|           | eGFR level G3a    | 1.853         | 9,0%         |
|           | eGFR level G3b    | 697           | 3,4%         |
|           | eGFR level G4     | 171           | 0,8%         |
|           | eGFR level G5     | 295           | 1,4%         |

Legend: eGFR,estimated Glomerular Filtration Rate

Table S4. ACR tests performed at t0 and t6

|           |                  | ENDORSE Data |             |
|-----------|------------------|--------------|-------------|
|           |                  | Number       | Percentage  |
| <b>T0</b> | <b>ACR tests</b> | <b>1.269</b> | <b>1,2%</b> |
|           | ACR level A1     | 1.172        | 92,4%       |
|           | ACR level A2     | 68           | 5,4%        |
|           | ACR level A3     | 29           | 2,3%        |
| <b>T6</b> | <b>ACR tests</b> | <b>2.477</b> | <b>2,2%</b> |
|           | ACR level A1     | 2.270        | 91,6%       |
|           | ACR level A2     |              | 6,0%        |

Legend: ACR, Albumin-Creatinine Ratio

Table S5. Results of the clinical evolution simulation for the ENDORSE cohort

| eGFR level |                 | Baseline N | Baseline % | Year 1 N | Year 1 % | Year 2 N | Year 2 % | Year 3 N | Year 3 % | Year 4 N | Year 4 % | Year 5 N | Year 5 % |
|------------|-----------------|------------|------------|----------|----------|----------|----------|----------|----------|----------|----------|----------|----------|
| Scenario 1 | G1              | 682        | 29,2%      | 622      | 26,6%    | 544      | 23,3%    | 477      | 20,4%    | 414      | 17,7%    | 358      | 15,3%    |
|            | G2              | 1206       | 51,7%      | 1.173    | 50,2%    | 1174     | 50,3%    | 1145     | 49,0%    | 1142     | 48,9%    | 1119     | 47,9%    |
|            | G3a             | 304        | 13,0%      | 345      | 14,8%    | 373      | 16,0%    | 425      | 18,2%    | 427      | 18,3%    | 439      | 18,8%    |
|            | G3b             | 87         | 3,7%       | 132      | 5,7%     | 166      | 7,1%     | 198      | 8,5%     | 233      | 10,0%    | 270      | 11,6%    |
|            | G4              | 23         | 1,0%       | 26       | 1,1%     | 38       | 1,6%     | 48       | 2,1%     | 71       | 3,0%     | 92       | 3,9%     |
|            | G5 not dialyzed | 7          | 0,3%       | 12       | 0,5%     | 15       | 0,6%     | 12       | 0,5%     | 17       | 0,7%     | 21       | 0,9%     |
|            | G5 dialyzed     | 25         | 1,1%       | 25       | 1,1%     | 25       | 1,1%     | 30       | 1,3%     | 31       | 1,3%     | 36       | 1,5%     |
| Scenario 2 | G1              | 682        | 29,2%      | 642      | 27,5%    | 594      | 25,4%    | 545      | 23,3%    | 502      | 21,5%    | 467      | 20,0%    |
|            | G2              | 1206       | 51,7%      | 1.199    | 51,3%    | 1194     | 51,1%    | 1192     | 51,0%    | 1198     | 51,3%    | 1175     | 50,3%    |
|            | G3a             | 304        | 13,0%      | 326      | 14,0%    | 338      | 14,5%    | 361      | 15,5%    | 375      | 16,1%    | 404      | 17,3%    |
|            | G3b             | 87         | 3,7%       | 108      | 4,6%     | 145      | 6,2%     | 166      | 7,1%     | 178      | 7,6%     | 197      | 8,4%     |
|            | G4              | 23         | 1,0%       | 24       | 1,0%     | 26       | 1,1%     | 32       | 1,4%     | 43       | 1,8%     | 52       | 2,2%     |
|            | G5 not dialyzed | 7          | 0,3%       | 11       | 0,5%     | 13       | 0,6%     | 14       | 0,6%     | 14       | 0,6%     | 13       | 0,6%     |
|            | G5 dialyzed     | 25         | 1,1%       | 25       | 1,1%     | 25       | 1,1%     | 25       | 1,1%     | 25       | 1,1%     | 27       | 1,2%     |

Legend: eGFR,estimated Glomerular Filtration Rate

Table S6. Results of the clinical evolution simulation for the population of reference

| eGFR level |                 | Baseline N | Baseline % | Year 1 N | Year 1 % | Year 2 N | Year 2 % | Year 3 N | Year 3 % | Year 4 N | Year 4 % | Year 5 N | Year 5 % |
|------------|-----------------|------------|------------|----------|----------|----------|----------|----------|----------|----------|----------|----------|----------|
| Scenario 1 | G1              | 91.003     | 26,1%      | 82.967   | 23,8%    | 72.563   | 20,8%    | 63.747   | 18,3%    | 55.348   | 15,9%    | 47.952   | 13,8%    |
|            | G2              | 160.934    | 46,2%      | 156.464  | 44,9%    | 156.598  | 44,9%    | 153.019  | 43,9%    | 152.676  | 43,8%    | 149.884  | 43,0%    |
|            | G3a             | 40.615     | 11,7%      | 46.019   | 13,2%    | 49.754   | 14,3%    | 56.798   | 16,3%    | 57.086   | 16,4%    | 58.802   | 16,9%    |
|            | G3b             | 11.604     | 3,3%       | 17.607   | 5,1%     | 22.142   | 6,4%     | 26.461   | 7,6%     | 31.150   | 8,9%     | 36.165   | 10,4%    |
|            | G4              | 3.054      | 0,9%       | 3.468    | 1,0%     | 5.069    | 1,5%     | 6.415    | 1,8%     | 9.492    | 2,7%     | 12.323   | 3,5%     |
|            | G5 not dialyzed | 916        | 0,3%       | 1.601    | 0,5%     | 2.001    | 0,6%     | 1.604    | 0,5%     | 2.273    | 0,7%     | 2.813    | 0,8%     |
|            | G5 dialyzed     | 40.377     | 11,6%      | 40376,55 | 11,6%    | 40.377   | 11,6%    | 40.460   | 11,6%    | 40.477   | 11,6%    | 40.564   | 11,6%    |
| Scenario 2 | G1              | 91.003     | 26,1%      | 85.635   | 24,6%    | 79.232   | 22,7%    | 72.696   | 20,9%    | 66.961   | 19,2%    | 62.340   | 17,9%    |
|            | G2              | 160.934    | 46,2%      | 159.932  | 45,9%    | 159.265  | 45,7%    | 158.999  | 45,6%    | 159.799  | 45,9%    | 156.851  | 45,0%    |
|            | G3a             | 40.615     | 11,7%      | 43.484   | 12,5%    | 45.085   | 12,9%    | 48.153   | 13,8%    | 50.021   | 14,4%    | 53.930   | 15,5%    |
|            | G3b             | 11.604     | 3,3%       | 14.406   | 4,1%     | 19.341   | 5,5%     | 22.142   | 6,4%     | 23.743   | 6,8%     | 26.298   | 7,5%     |
|            | G4              | 3.054      | 0,9%       | 3.201    | 0,9%     | 3.468    | 1,0%     | 4.268    | 1,2%     | 5.736    | 1,6%     | 6.941    | 2,0%     |
|            | G5 not dialyzed | 916        | 0,3%       | 1.467    | 0,4%     | 1.734    | 0,5%     | 1.867    | 0,5%     | 1.867    | 0,5%     | 1.735    | 0,5%     |
|            | G5 dialyzed     | 40.377     | 11,6%      | 40376,55 | 11,6%    | 40.377   | 11,6%    | 40.377   | 11,6%    | 40.377   | 11,6%    | 40.408   | 11,6%    |

Legend: eGFR,estimated Glomerular Filtration Rate

Table S7. Economic impact for the population of reference

|                    |             | Baseline        | Year 1          | Year 2          | Year 3          | Year 4          | Year 5          | Cumulative       |
|--------------------|-------------|-----------------|-----------------|-----------------|-----------------|-----------------|-----------------|------------------|
| Scenario 1         | Dialysis    | € 1.980.469.728 | € 1.980.469.728 | € 1.980.469.728 | € 1.984.556.729 | € 1.985.408.004 | € 1.989.660.104 | € 9.920.564.293  |
|                    | Other costs | € 682.637.061   | € 696.135.012   | € 710.687.245   | € 721.413.416   | € 740.036.474   | € 757.960.928   | € 3.626.233.075  |
|                    | Total       | € 2.663.106.789 | € 2.676.604.740 | € 2.691.156.973 | € 2.705.970.145 | € 2.725.444.478 | € 2.747.621.032 | € 13.546.797.368 |
| Scenario 2         | Dialysis    | € 1.980.469.728 | € 1.980.469.728 | € 1.980.469.728 | € 1.980.469.728 | € 1.980.469.728 | € 1.982.012.228 | € 9.903.891.140  |
|                    | Other costs | € 682.637.061   | € 690.319.828   | € 699.618.707   | € 707.795.660   | € 715.523.628   | € 723.052.215   | € 3.536.310.038  |
|                    | Total       | € 2.663.106.789 | € 2.670.789.556 | € 2.680.088.435 | € 2.688.265.388 | € 2.695.993.356 | € 2.705.064.443 | € 13.440.201.178 |
| Difference (total) |             | € 0             | -€ 5.815.184    | -€ 11.068.538   | -€ 17.704.757   | -€ 29.451.122   | -€ 42.556.589   | -€ 106.596.190   |
| Difference %       |             | 0,00%           | -0,22%          | -0,41%          | -0,65%          | -1,08%          | -1,55%          | -0,79%           |

Legend: green is the saving
